# Supplementary material
Source: publisher figshare collection journal article supplement (https://sage.figshare.com/ndownloader/files/16118036)
Supplement: Supplementary file 1 [file 16118036]

## Appendix: Variables and Abbreviations

| Type of Variables           | Abbreviation           | Variable                                   | Description                                                | Detailed information                                                                                                                                                                                                                                                                                        |
|-----------------------------|------------------------|--------------------------------------------|------------------------------------------------------------|-------------------------------------------------------------------------------------------------------------------------------------------------------------------------------------------------------------------------------------------------------------------------------------------------------------|
| Dependent Variable          | <i>T</i>               | Tourism expenditure (Yuan)                 | Household expenditure on tourism in the past 12 months     | Including the costs of transportation, accommodation, catering, guide service, entrance tickets, and so on                                                                                                                                                                                                  |
| Independent Variable        | <i>I</i>               | Income (Thousand Yuan)                     | Household income in the past year                          | Including wage income, self-employed business income, agricultural income, public transfer income and financial support from others                                                                                                                                                                         |
|                             | <i>H</i>               | Housing wealth (Thousand Yuan)             | Market value of household housing assets                   |                                                                                                                                                                                                                                                                                                             |
|                             | <i>F</i>               | Financial wealth (Thousand Yuan)           | Household financial assets                                 | Including stock, fund, government bonds, trust products, foreign exchange products and so on                                                                                                                                                                                                                |
| conditional Variable        | <i>age</i>             | Age                                        | Real age of the family head                                | below 20 years, 21-30 (dummy=1), 31-40 (dummy=2), 41-50 (dummy=3), 51-60 (dummy=4), 61-70 (dummy=5) and above 71 years old (dummy=6).                                                                                                                                                                       |
|                             | <i>cohort</i>          | Cohort generation                          | Identified according to the birth year of family head      | the generation born before 1949 (dummy=1), the 1950s (dummy=2), born from 1950 to 1959; the 1960s (dummy=3), born from 1960 to 1969; the 1970s (dummy=4), born from 1970 to 1979; the 1980s (dummy=5), born from 1980 to 1989; the 1990s (dummy=6), born from 1990 to 1999; and generation born after 2000. |
| Family Control Variable     | <i>Family Size</i>     | Family size                                | Number of family members                                   | 1=yes, 0=no                                                                                                                                                                                                                                                                                                 |
|                             | <i>Subsidize</i>       | Subsidize                                  | Government subsidies in the past 12 months                 | 1=yes, 0=no                                                                                                                                                                                                                                                                                                 |
| Houseowner Control Variable | <i>Gender</i>          | Gender                                     | Gender of houseowner                                       | 1=male, 0=female                                                                                                                                                                                                                                                                                            |
|                             | <i>Education</i>       | Educational level                          | Education level of the houseowner                          | Primary school and below=1, Junior high school=2, Senior high school/3-year college=3, 4-year College/Bachelor's degree=4, Master's degree and above=5                                                                                                                                                      |
|                             | <i>Hukou</i>           | Hukou type                                 | Household registration type                                | 1=Urban, 0=rural                                                                                                                                                                                                                                                                                            |
|                             | <i>Marriage</i>        | Marital status                             | Marital status of the houseowner                           | 1=Married, 0=other marital status                                                                                                                                                                                                                                                                           |
|                             | <i>Employment</i>      | Employment                                 | Employment status of the houseowner                        | 1=Employed, 0=other employment status except self-employment                                                                                                                                                                                                                                                |
| Province Control Variable   | Number of scenic spots | Number of national graded 5As scenic spots | Number of national graded 5As scenic spots in the province | Data collected from the Year Book of Statistics; Data of 31 provinces included                                                                                                                                                                                                                              |
|                             | <i>Population</i>      | Population (10 Thousand)                   | Population of the province                                 |                                                                                                                                                                                                                                                                                                             |
|                             | <i>GDP</i>             | GDP per capita (10 Thousand Yuan)          | GDP per capita of the province                             |                                                                                                                                                                                                                                                                                                             |

|                           |               |                                                              |                                                                                     |                                                                     |
|---------------------------|---------------|--------------------------------------------------------------|-------------------------------------------------------------------------------------|---------------------------------------------------------------------|
|                           | <i>Saving</i> | Saving per capita<br>(10 Thousand Yuan)                      | Saving per capita of the<br>province                                                |                                                                     |
| Instrument<br>al variable | <i>lnLP</i>   | Land transfer price<br>in terms of<br>(yuan/m <sup>2</sup> ) | Government's land<br>transfer price of per unit<br>floorage in provincial<br>cities | Data is obtained from the China Real<br>Estate Index System (CREIS) |
